# Supplementary material for: Elucidating the role of the gut microbiota in the physiological effects of dietary fiber
Source: PubMed Central journal article supplement (PMC9107176; doi:10.1186/s40168-022-01248-5), 2022-05-13
Supplement: 40168_2022_1248_MOESM2_ESM.pdf [file 40168_2022_1248_MOESM2_ESM.pdf]

**Additional file 2: Table S1.** Baseline Clinical Measurements.

|                                                   | Arabinoxylan<br>(n=15)   | Microcrystalline Cellulose<br>(n=16) | Between Group<br>p value |
|---------------------------------------------------|--------------------------|--------------------------------------|--------------------------|
| Sex (F/M)                                         | 10/5                     | 11/5                                 |                          |
| Age (y)                                           | 33.7 ± 9.7               | 32.1 ± 7.4                           | 1.00                     |
| <b>Anthropometric Measurements</b>                |                          |                                      |                          |
| Body weight (kg)                                  | 84.8 ± 12.3              | 81.9 ± 10.5                          | 0.61                     |
| BMI (kg/m <sup>2</sup> )                          | 28.7 ± 2.7               | 28.7 ± 2.0                           | 0.98                     |
| Waist circumference (cm)                          | 95.7 ± 8.7               | 92.9 ± 6.0                           | 0.34                     |
| Body fat % - females                              | 36.4 ± 2.9               | 38.0 ± 6.1                           | 0.42                     |
| Body fat % - males                                | 22.5 ± 3.6               | 23.0 ± 5.3                           | 0.87                     |
| <b>Surrogate Endpoints</b>                        |                          |                                      |                          |
| Systolic (mm Hg)                                  | 118.5 ± 13.6             | 120.6 ± 15.7                         | 0.59                     |
| Diastolic (mm Hg)                                 | 71.4 ± 9.0               | 74.9 ± 12.3                          | 0.32                     |
| Pulse (beats/min)                                 | 73.1 ± 12.8              | 74.2 ± 12.6                          | 0.84                     |
| Red blood cells (10 <sup>12</sup> /L)             | 4.7 ± 0.3                | 4.6 ± 0.5                            | 0.44                     |
| Hemoglobin (g/L)                                  | 140.7 ± 11.6             | 134.2 ± 14.9                         | 0.12                     |
| Hematocrit (L/L)                                  | 0.42 ± 0.03              | 0.40 ± 0.04                          | 0.20                     |
| White blood cells (10 <sup>9</sup> /L)            | 6.3 ± 1.1                | 6.3 ± 1.5                            | 1.00                     |
| Platelets (10 <sup>9</sup> /L)                    | 243.8 ± 35.1             | 243.4 ± 42.7                         | 0.94                     |
| Glucose (mmol/L)                                  | 5.1 ± 0.4                | 5.0 ± 0.4                            | 0.84                     |
| Insulin (pg/mL)                                   | 649.9 ± 253.5            | 593.7 ± 254.3                        | 0.55                     |
| HOMA-IR                                           | 3.37 ± 1.34              | 3.02 ± 1.22                          | 0.36                     |
| QUICKI                                            | 0.288 ± 0.2              | 0.292 ± 0.2                          | 0.84                     |
| Total cholesterol (mmol/L)                        | 4.4 ± 0.8                | 4.6 ± 1.0                            | 0.57                     |
| LDL cholesterol (mmol/L)                          | 2.5 ± 0.6                | 2.7 ± 0.7                            | 0.94                     |
| HDL cholesterol (mmol/L)                          | 1.3 ± 0.3                | 1.3 ± 0.3                            | 1.00                     |
| Triglycerides (mmol/L)                            | 1.2 ± 0.8                | 1.4 ± 0.7                            | 0.96                     |
| hs-CRP (mg/L)                                     | 4.0 ± 4.6                | 3.6 ± 3.5 <sup>b</sup>               | 0.84                     |
| Fecal calprotectin (mg/kg)                        | 66.4 ± 45.2              | 63.4 ± 53.7                          | 0.90                     |
| <b>Biomarkers of Host-Microbiota Interactions</b> |                          |                                      |                          |
| Glucagon (pg/mL)                                  | 137.0 ± 40.2             | 137.6 ± 61.0                         | 0.98                     |
| GLP-1 (pg/mL)                                     | 13.9 ± 4.2               | 13.5 ± 6.3                           | 0.76                     |
| PYY (pg/mL)                                       | 62.6 ± 25.4              | 48.7 ± 15.4                          | 0.10                     |
| Ghrelin (pg/mL)                                   | 583.6 ± 291.0            | 687.4 ± 223.5                        | 0.18                     |
| Leptin (ng/mL)                                    | 28.5 ± 25.0              | 30.2 ± 27.5 <sup>a</sup>             | 0.80                     |
| Adiponectin (mg/L)                                | 15.0 ± 5.2               | 18.7 ± 10.9                          | 0.22                     |
| TNF-α (pg/mL)                                     | 2.6 ± 0.6                | 2.7 ± 0.6                            | 0.94                     |
| IL-6 (pg/mL)                                      | 0.69 ± 0.45              | 0.66 ± 0.25                          | 0.98                     |
| IL-8 (pg/mL)                                      | 3.2 ± 1.0 <sup>a</sup>   | 3.3 ± 0.8                            | 0.96                     |
| IL-10 (pg/mL)                                     | 0.25 ± 0.07              | 0.22 ± 0.07                          | 0.28                     |
| LBP (μg/mL)                                       | 52.1 ± 17.9              | 53.9 ± 14.7                          | 0.82                     |
| Fecal albumin (mg/L)                              | 5.1 ± 6.8                | 3.1 ± 4.7                            | 0.29                     |
| Fecal zonulin (μg/mL)                             | 0.41 ± 0.44 <sup>a</sup> | 0.21 ± 0.34                          | 0.18                     |
| TMAO (μM)                                         | 3.7 ± 1.8                | 2.9 ± 1.3                            | 0.19                     |

Statistical significances of between-group differences at baseline (AX vs MCC) were determined by unpaired permutational *t*-tests. Data are means ± SD. Statistical significance was set at *p*<0.01.

<sup>a</sup> One outlier >5\*SD from the mean was excluded; <sup>b</sup> Two outliers >5\*SD from the mean were excluded.

Abbreviations: BMI, body mass index; GLP-1, active glucagon-like peptide-1; HDL, high-density lipoprotein; hs-CRP, high-sensitivity C-reactive protein; HOMA-IR, homeostatic model assessment of insulin resistance; IL, interleukin; LBP, lipopolysaccharide-binding protein; LDL, low-density lipoprotein; PYY, total peptide tyrosine tyrosine; QUICKI, quantitative insulin sensitivity check index; TMAO, trimethylamine *N*-oxide; TNF-α, tumor necrosis factor-α.
