# Supplementary material for: Elucidating the role of the gut microbiota in the physiological effects of dietary fiber
Source: PubMed Central journal article supplement (PMC9107176; doi:10.1186/s40168-022-01248-5), 2022-05-13
Supplement: 40168_2022_1248_MOESM4_ESM.pdf [file 40168_2022_1248_MOESM4_ESM.pdf]

**Additional file 4: Table S3.** Clinical Measurements at Baseline and Six Weeks of Arabinoxylan or Microcrystalline Cellulose Supplementation.

|                                                   | Arabinoxylan (n=15)    |                        |                      |                                        | Microcrystalline Cellulose (n=16) |                        |                      |                                        | Between Group Change p value |
|---------------------------------------------------|------------------------|------------------------|----------------------|----------------------------------------|-----------------------------------|------------------------|----------------------|----------------------------------------|------------------------------|
|                                                   | Baseline               | Week 6                 | Within Group p value | Change (%)                             | Baseline                          | Week 6                 | Within Group p value | Change (%)                             |                              |
| <b>Anthropometric Measurements</b>                |                        |                        |                      |                                        |                                   |                        |                      |                                        |                              |
| Body weight (kg)                                  | 84.8±12.3              | 85.2±12.9              | 0.45                 | 0.4±1.9                                | 81.9±10.5                         | 81.3±10.2              | 0.12                 | -0.8±1.9                               | 0.17                         |
| BMI (kg/m <sup>2</sup> )                          | 28.7±2.7               | 28.8±2.8               | 0.47                 | 0.4±1.9                                | 28.7±2.0                          | 28.5±2.1               | 0.13                 | -0.8±1.9                               | 0.11                         |
| WC (cm)                                           | 95.7±8.7               | 95.5±8.1               | 0.81                 | -0.1±3.2                               | 92.9±6.0                          | 91.9±6.8               | 0.16                 | -1.2±3.0                               | 0.43                         |
| Body fat % - females                              | 36.4±2.9               | 36.6±3.6               | 0.22                 | 0.7±3.9                                | 38.0±6.1                          | 38.5±6.1               | 0.50                 | 1.5±3.4                                | 0.82                         |
| Body fat % - males                                | 22.5±3.6               | 23.0±3.2               | 0.61                 | 2.3±4.1                                | 23.0±5.3                          | 23.2±5.6               | 0.30                 | 1.1±4.3                                | 1.00                         |
| <b>Surrogate Endpoints</b>                        |                        |                        |                      |                                        |                                   |                        |                      |                                        |                              |
| Systolic (mm Hg)                                  | 118.5±13.6             | 116.6±13.6             | 0.28                 | -1.5±5.5                               | 120.6±15.7                        | 120.3±17.8             | 0.89                 | -0.2±6.4                               | 0.60                         |
| Diastolic (mm Hg)                                 | 71.4±9.0               | 71.4±8.7               | 1.00                 | 0.4±7.4                                | 74.9±12.3                         | 75.3±12.1              | 0.77                 | 0.8±7.0                                | 0.92                         |
| Pulse (beats/min)                                 | 73.1±12.8              | 70.6±10.3              | 0.15                 | -2.6±8.6                               | 74.2±12.6                         | 77.3±11.2              | 0.18                 | 5.4±13.9                               | 0.12                         |
| RBC (10 <sup>12</sup> /L)                         | 4.7±0.3                | 4.7±0.3                | 0.77                 | 0.6±5.1                                | 4.6±0.5                           | 4.7±0.5                | <b>0.02</b>          | 2.4±3.0                                | 0.27                         |
| Hemoglobin (g/L)                                  | 140.7±11.6             | 141.3±9.7              | 1.00                 | 0.6±4.1                                | 134.2±14.9                        | 136.6±15.1             | 0.07                 | 1.8±3.0                                | 0.71                         |
| Hematocrit (L/L)                                  | 0.42±0.03              | 0.42±0.03              | 1.00                 | 0.3±4.1                                | 0.40±0.04                         | 0.41±0.04              | <b>0.03</b>          | 2.2±2.6                                | 0.10                         |
| WBC (10 <sup>9</sup> /L)                          | 6.3±1.1                | 6.2±1.1                | 0.75                 | 0.1±13.4                               | 6.3±1.5                           | 6.3±1.2                | 1.00                 | 2.6±16.6                               | 0.58                         |
| Platelets (10 <sup>9</sup> /L)                    | 243.8±35.1             | 251.9±61.6             | 1.00                 | 2.8±17.3                               | 243.4±42.7                        | 253.8±51.0             | 0.23                 | 4.4±10.6                               | 0.82                         |
| Glucose (mmol/L)                                  | 5.1±0.4                | 5.0±0.4                | 0.21                 | -1.8±5.5                               | 5.0±0.4                           | 5.1±0.5                | 0.63                 | 0.7±6.0                                | 0.69                         |
| Insulin (pg/mL)                                   | 649.9±253.5            | 544.4±200.1            | <b>0.046</b>         | -10.2±36.3                             | 593.7±254.3                       | 658.7±177.5            | 0.21                 | 22.5±38.1                              | <b>0.02</b>                  |
| HOMA-IR                                           | 3.4±1.3                | 2.8±1.2                | <b>0.04</b>          | -11.8±35.5                             | 3.0±1.2                           | 3.4±0.9                | 0.23                 | 24.6±44.0                              | <b>0.006 *</b>               |
| QUICKI                                            | 0.288±0.02             | 0.295±0.02             | 0.06                 | 2.5±4.6                                | 0.292±0.02                        | 0.286±0.01             | 0.06                 | -2.0±4.4                               | <b>0.008 *</b>               |
| Total-C (mmol/L)                                  | 4.4±0.8                | 4.6±0.8                | <b>0.02</b>          | 4.9±7.1                                | 4.6±1.0                           | 4.7±1.0                | 0.42                 | 2.2±9.9                                | 0.43                         |
| LDL-C (mmol/L)                                    | 2.5±0.6                | 2.7±0.7                | <b>0.03</b>          | 9.3±14.6                               | 2.7±0.7                           | 2.7±0.9                | 0.63                 | 1.7±18.1                               | 0.39                         |
| HDL-C (mmol/L)                                    | 1.3±0.3                | 1.3±0.3                | 0.65                 | 2.8±12.9                               | 1.3±0.3                           | 1.2±0.3                | 0.12                 | -3.9±9.1                               | 0.09                         |
| Triglycerides (mmol/L)                            | 1.2±0.8                | 1.1±0.5                | 0.59                 | 9.8±43.2                               | 1.4±0.7                           | 1.6±0.6                | 0.23                 | 30.0±57.7                              | 0.33                         |
| hs-CRP (mg/L)                                     | 4.0±4.6                | 3.1±3.2                | 0.25                 | 5.7±66.1                               | 3.6±3.5 <sup>b</sup>              | 3.5±3.4 <sup>b</sup>   | 0.71                 | -0.6±37.4 <sup>b</sup>                 | 0.82                         |
| f-Calprotectin (mg/kg)                            | 66.4±45.2              | 63.8±55.1              | 0.85                 | 14.3±77.5                              | 63.4±53.7                         | 38.5±35.5              | <b>0.004 *</b>       | -39.1±24.0                             | <b>0.002 *</b>               |
| <b>Biomarkers of Host-Microbiota Interactions</b> |                        |                        |                      |                                        |                                   |                        |                      |                                        |                              |
| Glucagon (pg/mL)                                  | 137.0±40.2             | 129.6±34.6             | 0.09                 | -3.7±12.7                              | 137.6±61.0                        | 132.3±57.1             | 0.28                 | -2.9±11.6                              | 0.88                         |
| GLP-1 (pg/mL)                                     | 13.9±4.2               | 12.3±5.5               | <b>0.047</b>         | -15.6±27.7                             | 13.5±6.3                          | 13.6±6.2               | 0.96                 | 5.1±58.3                               | 0.22                         |
| PYY (pg/mL)                                       | 62.6±25.4              | 56.9±21.8              | 0.13                 | -6.4±23.9                              | 48.7±15.4                         | 49.6±19.1              | 0.82                 | 3.1±32.5                               | 0.35                         |
| Ghrelin (pg/mL)                                   | 583.6±291.0            | 539.8±427.1            | 0.57                 | -7.8±33.9                              | 687.4±223.5                       | 670.7±262.6            | 0.65                 | -2.8±20.2                              | 0.66                         |
| Leptin (ng/mL)                                    | 28.5±25.0              | 27.6±18.0              | 0.73                 | 21.7±42.4                              | 30.2±27.5 <sup>a</sup>            | 31.0±25.6 <sup>a</sup> | 0.69                 | 9.7±29.2 <sup>a</sup>                  | 0.38                         |
| Adiponectin (mg/L)                                | 15.0±5.2               | 16.6±6.7               | 0.10                 | 11.1±19.0                              | 18.7±10.9                         | 18.6±11.4              | 0.93                 | 1.7±14.8                               | 0.12                         |
| TNF-α (pg/mL)                                     | 2.6±0.6                | 2.5±0.6                | 0.36                 | -2.0±13.6                              | 2.7±0.6                           | 2.5±0.6                | <b>0.004 *</b>       | -6.7±8.7                               | 0.67                         |
| IL-6 (pg/mL)                                      | 0.69±0.45              | 0.67±0.36              | 0.86                 | 11.0±49.0                              | 0.66±0.25                         | 0.61±0.27              | 0.32                 | -2.8±33.1                              | 0.51                         |
| IL-8 (pg/mL)                                      | 3.2±1.0 <sup>a</sup>   | 3.2±1.2 <sup>a</sup>   | 0.91                 | 0.7±19.8 <sup>a</sup>                  | 3.3±0.8                           | 3.4±0.7                | 0.52                 | 4.8±18.0                               | 0.64                         |
| IL-10 (pg/mL)                                     | 0.25±0.07              | 0.25±0.12              | 0.82                 | -1.0±34.9                              | 0.22±0.07                         | 0.24±0.07              | 0.23                 | 12.7±30.9                              | 0.15                         |
| LBP (μg/mL)                                       | 52.1±17.9              | 50.7±17.1              | 0.80                 | 3.1±39.1                               | 53.9±14.7                         | 48.1±14.3              | 0.09                 | -7.6±26.7                              | 0.76                         |
| f-Albumin (mg/L)                                  | 5.1±6.8                | 5.1±5.2                | 0.96                 | 78.8±207.9                             | 3.1±4.7                           | 2.7±3.9                | 0.71                 | 48.7±197.4                             | 1.00                         |
| f-Zonulin (μg/mL)                                 | 0.41±0.44 <sup>a</sup> | 0.43±0.60 <sup>a</sup> | 0.85                 | 48.9±116.1 <sup>a</sup>                | 0.21±0.34                         | 0.25±0.43              | 0.42                 | 28.2±103.4                             | 0.80                         |
| TMAO (μM)                                         | 3.7±1.8                | 3.1±1.4                | 0.35                 | 3.2±62.1                               | 2.9±1.3                           | 2.8±1.4                | 0.93                 | 16.1±78.0                              | 0.58                         |
| <b>Stool characteristics<sup>c</sup></b>          |                        |                        |                      |                                        |                                   |                        |                      |                                        |                              |
|                                                   |                        |                        |                      | <b>AUC<sub>BL-W6</sub><sup>c</sup></b> |                                   |                        |                      | <b>AUC<sub>BL-W6</sub><sup>c</sup></b> |                              |
| Stool consistency                                 | 1.9±1.1                | 2.3±0.5                | 0.65                 | 12.9±3.3                               | 1.8±0.9                           | 1.8±0.9                | 1.00                 | 10.9±2.2                               | 0.06                         |
| Bowel frequency                                   | 1.7±0.8                | 2.1±0.7                | 0.47                 | 13.0±4.5                               | 2.1±0.9                           | 2.1±1.0                | 1.00                 | 13.3±5.4                               | 0.81                         |

Statistical significances of changes within-group were determined by paired permutational *t*-tests, while between-group differences (AX vs MCC; week 6 – baseline/baseline\*100) were determined by unpaired permutational *t*-tests. Data are means ± SD.

\* Statistical significance was set at *p*<0.01, bolded *p* values without an asterisk (\*) are approaching statistical significance (*p*<0.05).

<sup>a</sup> One outlier >5\*SD from the mean was excluded; <sup>b</sup> Two outliers >5\*SD from the mean were excluded; <sup>c</sup> referred to our preceding study[1], changes within-group were determined by GEE models, while between-group differences in the area under the curve from baseline to week 6 (AUC<sub>BL-W6</sub>) were determined by Mann-Whitney tests.

Abbreviations: BMI, body mass index; f-, quantified in feces; GLP-1, active glucagon-like peptide-1; HDL-C, high-density lipoprotein cholesterol; hs-CRP, high-sensitivity C-reactive protein; HOMA-IR, homeostatic model assessment of insulin resistance; IL, interleukin; LBP, lipopolysaccharide-binding protein; LDL-C, low-density lipoprotein cholesterol; PYY, total peptide tyrosine tyrosine; QUICKI, quantitative insulin sensitivity check index; Total-C, total cholesterol; TMAO, trimethylamine *N*-oxide; TNF-α, tumor necrosis factor-α; WC, waist circumference; WBC, white blood cells.
