# Supplementary material for: Elucidating the role of the gut microbiota in the physiological effects of dietary fiber
Source: PubMed Central journal article supplement (PMC9107176; doi:10.1186/s40168-022-01248-5), 2022-05-13
Supplement: 40168_2022_1248_MOESM5_ESM.pdf [file 40168_2022_1248_MOESM5_ESM.pdf]

**Additional file 5: Table S4.** Covariate-Adjustment of Dietary Fiber Treatment Effects by ANCOVA.

|                                              | Within AX Group<br>(Baseline vs Week 6; <i>n</i> =15) |             |      |      |      |             | Within MCC Group<br>(Baseline vs Week 6; <i>n</i> =16) |              |                  |              |              |              | Between Group<br>(AX vs MCC) |              |              |              |              |              |
|----------------------------------------------|-------------------------------------------------------|-------------|------|------|------|-------------|--------------------------------------------------------|--------------|------------------|--------------|--------------|--------------|------------------------------|--------------|--------------|--------------|--------------|--------------|
|                                              | M1                                                    | M2          | M3   | M4   | M5   | M6          | M1                                                     | M2           | M3               | M4           | M5           | M6           | M1                           | M2           | M3           | M4           | M5           | M6           |
| Satiety after a meal <sup>a</sup>            | --                                                    | --          | --   | --   | --   | --          | --                                                     | --           | --               | --           | --           | --           | <b>0.03</b>                  | <b>0.04</b>  | <b>0.03</b>  | <b>0.03</b>  | <b>0.04</b>  | <b>0.04</b>  |
| HOMA-IR <sup>b</sup>                         | <b>0.04</b>                                           | <b>0.04</b> | 0.33 | 0.18 | 0.11 | <b>0.03</b> | 0.23                                                   | 0.23         | 0.06             | 0.57         | 0.21         | 0.22         | <b>0.02</b>                  | <b>0.005</b> | <b>0.02</b>  | <b>0.01</b>  | <b>0.03</b>  | <b>0.03</b>  |
| QUICKI <sup>b</sup>                          | 0.07                                                  | 0.06        | 0.50 | 0.29 | 0.13 | 0.05        | 0.06                                                   | 0.06         | <b>0.01</b>      | 0.20         | 0.06         | 0.06         | <b>0.005</b>                 | <b>0.005</b> | <b>0.01</b>  | <b>0.005</b> | <b>0.006</b> | <b>0.01</b>  |
| Fecal calprotectin <sup>b</sup>              | 0.85                                                  | 0.85        | 0.18 | 0.96 | 0.85 | 0.94        | <b>0.002</b>                                           | <b>0.004</b> | 0.98             | <b>0.007</b> | <b>0.006</b> | <b>0.005</b> | <b>0.01</b>                  | <b>0.01</b>  | <b>0.007</b> | <b>0.007</b> | <b>0.005</b> | <b>0.005</b> |
| Tumor necrosis factor- $\alpha$ <sup>b</sup> | 0.37                                                  | 0.36        | 0.06 | 0.21 | 0.38 | 0.18        | <b>0.006</b>                                           | <b>0.005</b> | <b>&lt;0.001</b> | <b>0.007</b> | <b>0.03</b>  | <b>0.006</b> | 0.51                         | 0.32         | 0.24         | 0.47         | 0.42         | 0.20         |

**M1**: model adjusted for age. **M2**: model adjusted for sex. **M3**: model adjusted for changes in total dietary fiber intake, which considers the amount of supplemental fiber. **M4**: model adjusted for changes in total dietary sugar intake. **M5**: model adjusted for differences in stool consistency. **M6**: model adjusted for differences in bowel movement frequency. Statistical significances of changes within-group were determined by repeated measures permutational ANCOVA models, while between-group differences of either (a) area under the curve or (b) percent change from baseline (during intervention – baseline/baseline\*100) were determined by unpaired permutational ANCOVA. Data presented as *p* values with significance set at *p*<0.05 (bolded *p* values).

Abbreviations: AX, arabinoxylan; ANCOVA, analysis of covariance; HOMA-IR, homeostatic model assessment of insulin resistance; MCC, microcrystalline cellulose; QUICKI, quantitative insulin sensitivity check index.
