# Supplementary material for: Elucidating the role of the gut microbiota in the physiological effects of dietary fiber
Source: PubMed Central journal article supplement (PMC9107176; doi:10.1186/s40168-022-01248-5), 2022-05-13
Supplement: 40168_2022_1248_MOESM6_ESM.pdf [file 40168_2022_1248_MOESM6_ESM.pdf]

**Additional file 6: Table S5.** Fecal Concentrations of Remaining Bile Acids Detected at Baseline and Six Weeks of Arabinosyloxan or Microcrystalline Cellulose Supplementation.

| Fecal Bile Acids (nmol/g)                                  | Arabinosyloxan (n=15)           |                                |                             |                                 | Microcrystalline Cellulose (n=16) |                              |                             |                               | Between Group Change <i>p</i> value |
|------------------------------------------------------------|---------------------------------|--------------------------------|-----------------------------|---------------------------------|-----------------------------------|------------------------------|-----------------------------|-------------------------------|-------------------------------------|
|                                                            | Baseline                        | Week 6                         | Within Group <i>p</i> value | Change (W6-BL)                  | Baseline                          | Week 6                       | Within Group <i>p</i> value | Change (W6-BL)                |                                     |
| Tauro- $\alpha$ -muricholic acid                           | 1.5 $\pm$ 1.9                   | 1.9 $\pm$ 3.5                  | 0.69                        | 0.4 $\pm$ 0.29                  | 1.5 $\pm$ 2.5                     | 1.1 $\pm$ 2.9                | 0.52                        | -0.4 $\pm$ 2.2                | 0.38                                |
| $\alpha$ -Muricholic acid                                  | 0.81 $\pm$ 1.52 <sup>a</sup>    | 0.12 $\pm$ 0.44 <sup>a</sup>   | 0.18                        | -0.68 $\pm$ 1.65 <sup>a</sup>   | 0.44 $\pm$ 1.56                   | 0.17 $\pm$ 0.51              | 0.77                        | -0.26 $\pm$ 1.69              | 0.53                                |
| $\beta$ -Muricholic acid                                   | 0.49 $\pm$ 1.36                 | 0.11 $\pm$ 0.26                | 0.45                        | -0.38 $\pm$ 1.41                | 0.23 $\pm$ 0.42 <sup>a</sup>      | 0.43 $\pm$ 0.83 <sup>a</sup> | 0.59                        | 0.21 $\pm$ 0.90 <sup>a</sup>  | 0.23                                |
| $\lambda$ -Muricholic acid                                 | 7.5 $\pm$ 15.3 <sup>a</sup>     | 2.6 $\pm$ 3.9 <sup>a</sup>     | 0.36                        | -4.9 $\pm$ 15.3 <sup>a</sup>    | 0.6 $\pm$ 1.2                     | 6.3 $\pm$ 15.5               | 0.23                        | 5.6 $\pm$ 15.3                | 0.05                                |
| $\omega$ -Muricholic acid                                  | 115.3 $\pm$ 237.7 <sup>a</sup>  | 74.4 $\pm$ 85.4 <sup>a</sup>   | 0.67                        | -40.9 $\pm$ 226.0 <sup>a</sup>  | 28.9 $\pm$ 55.0                   | 174.1 $\pm$ 439.6            | 0.41                        | 145.2 $\pm$ 433.2             | 0.12                                |
| Dehydrocholic acid                                         | 2.8 $\pm$ 4.0                   | 3.6 $\pm$ 6.1                  | 0.68                        | 0.8 $\pm$ 6.9                   | 1.9 $\pm$ 3.5                     | 1.1 $\pm$ 2.6                | 0.49                        | -0.8 $\pm$ 4.0                | 0.31                                |
| Glycohyocholic acid                                        | 0.02 $\pm$ 0.06 <sup>a</sup>    | 0.00 $\pm$ 0.00 <sup>a</sup>   | 0.67                        | -0.02 $\pm$ 0.06 <sup>a</sup>   | 0.02 $\pm$ 0.08                   | 0.03 $\pm$ 0.12              | 0.75                        | 0.01 $\pm$ 0.15               | 0.69                                |
| Glycohyodeoxycholic acid                                   | 0.08 $\pm$ 0.11                 | 0.03 $\pm$ 0.03                | 0.28                        | -0.05 $\pm$ 0.12                | 0.09 $\pm$ 0.14                   | 0.04 $\pm$ 0.08              | 0.06                        | -0.05 $\pm$ 0.10              | 1.00                                |
| Glycoursodeoxycholic acid                                  | 2.1 $\pm$ 3.3 <sup>a</sup>      | 1.8 $\pm$ 2.1 <sup>a</sup>     | 0.61                        | -0.2 $\pm$ 1.8 <sup>a</sup>     | 2.1 $\pm$ 2.9                     | 0.9 $\pm$ 1.1                | 0.14                        | -1.2 $\pm$ 2.6                | 0.78                                |
| Taurodeoxycholic acid                                      | 4.3 $\pm$ 4.9                   | 9.0 $\pm$ 13.0                 | 0.25                        | 4.7 $\pm$ 13.4                  | 13.9 $\pm$ 24.3 <sup>a</sup>      | 1.4 $\pm$ 2.2 <sup>a</sup>   | <b>0.04</b>                 | -12.5 $\pm$ 23.8 <sup>a</sup> | <b>0.014</b>                        |
| Taurohyocholic acid                                        | 0.06 $\pm$ 0.23 <sup>a</sup>    | 0.06 $\pm$ 0.14 <sup>a</sup>   | 0.91                        | 0.00 $\pm$ 0.28 <sup>a</sup>    | 0.03 $\pm$ 0.07                   | 0.02 $\pm$ 0.07              | 0.85                        | -0.01 $\pm$ 0.10              | 0.88                                |
| Ursodeoxycholic acid                                       | 510.0 $\pm$ 1084.6 <sup>a</sup> | 147.1 $\pm$ 209.7 <sup>a</sup> | 0.28                        | -362.9 $\pm$ 997.7 <sup>a</sup> | 25.3 $\pm$ 37.6                   | 283.1 $\pm$ 772.9            | 0.45                        | 257.9 $\pm$ 772.0             | <b>0.017</b>                        |
| Norursodeoxycholic acid                                    | 0.63 $\pm$ 0.83                 | 0.43 $\pm$ 0.58                | 0.52                        | -0.20 $\pm$ 0.98                | 0.52 $\pm$ 0.65                   | 0.19 $\pm$ 0.41              | 0.11                        | -0.33 $\pm$ 0.80              | 0.58                                |
| 12-Ketolithocholic acid                                    | 0.46 $\pm$ 1.03                 | 0.44 $\pm$ 0.87                | 0.87                        | -0.02 $\pm$ 1.27                | 0.61 $\pm$ 0.82                   | 0.32 $\pm$ 0.54              | 0.24                        | -0.29 $\pm$ 0.88              | 0.64                                |
| 6,7-diKetolithocholic acid                                 | 0.10 $\pm$ 0.21                 | 0.01 $\pm$ 0.05                | 0.13                        | -0.09 $\pm$ 0.18                | 0.45 $\pm$ 0.73                   | 0.23 $\pm$ 0.33              | 0.30                        | -0.23 $\pm$ 0.78              | 0.64                                |
| 3-Oxocholeic acid                                          | 1.4 $\pm$ 4.6 <sup>a</sup>      | 1.4 $\pm$ 2.9 <sup>a</sup>     | 0.92                        | 0.0 $\pm$ 4.3 <sup>a</sup>      | 0.1 $\pm$ 0.2                     | 3.9 $\pm$ 10.5               | 0.27                        | 3.8 $\pm$ 10.5                | 0.27                                |
| diOxolithocholic acid                                      | 1.2 $\pm$ 1.0                   | 0.9 $\pm$ 1.4                  | 0.39                        | -0.3 $\pm$ 1.8                  | 0.88 $\pm$ 0.84                   | 0.42 $\pm$ 0.55              | 0.10                        | -0.46 $\pm$ 0.99              | 0.80                                |
| 3 $\beta$ 7 $\alpha$ -diOH-5-cholestenoic acid             | 0.09 $\pm$ 0.19                 | 0.10 $\pm$ 0.22                | 0.95                        | 0.01 $\pm$ 0.33                 | 0.08 $\pm$ 0.31 <sup>a</sup>      | 0.04 $\pm$ 0.17 <sup>a</sup> | 0.85                        | -0.04 $\pm$ 0.36 <sup>a</sup> | 0.76                                |
| Allocholic acid 3-SO <sub>4</sub> <sup>2-</sup>            | 68.6 $\pm$ 177.8                | 50.2 $\pm$ 140.0               | 0.84                        | -18.5 $\pm$ 206.0               | 72.5 $\pm$ 194.8                  | 49.3 $\pm$ 123.3             | 0.54                        | -23.2 $\pm$ 118.9             | 0.94                                |
| Glycocholic acid 3-SO <sub>4</sub> <sup>2-</sup>           | 0.01 $\pm$ 0.03                 | 0.01 $\pm$ 0.04                | 0.98                        | 0.00 $\pm$ 0.05                 | 0.01 $\pm$ 0.04                   | 0.00 $\pm$ 0.01              | 0.36                        | -0.01 $\pm$ 0.04              | 0.67                                |
| Glycochenodeoxycholic acid 3-SO <sub>4</sub> <sup>2-</sup> | 0.22 $\pm$ 0.60 <sup>a</sup>    | 0.12 $\pm$ 0.27 <sup>a</sup>   | 0.73                        | -0.10 $\pm$ 0.70 <sup>a</sup>   | 0.27 $\pm$ 0.51                   | 0.12 $\pm$ 0.25              | 0.25                        | -0.15 $\pm$ 0.58              | 0.94                                |
| Glycoursodeoxycholic acid 3-SO <sub>4</sub> <sup>2-</sup>  | 0.16 $\pm$ 0.34                 | 0.04 $\pm$ 0.08                | 0.22                        | -0.12 $\pm$ 0.33                | 0.04 $\pm$ 0.12                   | 0.09 $\pm$ 0.29              | 0.50                        | 0.05 $\pm$ 0.18               | 0.08                                |
| Taurolithocholic acid 3-SO <sub>4</sub> <sup>2-</sup>      | 1.5 $\pm$ 1.1                   | 0.7 $\pm$ 0.9                  | 0.06                        | -0.8 $\pm$ 1.5                  | 1.9 $\pm$ 3.4 <sup>a</sup>        | 1.2 $\pm$ 1.5 <sup>a</sup>   | 0.58                        | -0.8 $\pm$ 3.8 <sup>a</sup>   | 1.00                                |
| Taurodeoxycholic acid 3-SO <sub>4</sub> <sup>2-</sup>      | 0.17 $\pm$ 0.20                 | 0.57 $\pm$ 1.68                | 0.66                        | 0.39 $\pm$ 1.56                 | 0.44 $\pm$ 0.92 <sup>a</sup>      | 0.06 $\pm$ 0.09 <sup>a</sup> | 0.13                        | -0.39 $\pm$ 0.94 <sup>a</sup> | 0.06                                |
| Taurochenodeoxycholic acid 3-SO <sub>4</sub> <sup>2-</sup> | 0.18 $\pm$ 0.39                 | 0.21 $\pm$ 0.38                | 0.73                        | 0.03 $\pm$ 0.60                 | 0.22 $\pm$ 0.49                   | 0.11 $\pm$ 0.26              | 0.32                        | -0.12 $\pm$ 0.54              | 0.82                                |
| Tauroursodeoxycholic acid 3-SO <sub>4</sub> <sup>2-</sup>  | 0.11 $\pm$ 0.18                 | 0.02 $\pm$ 0.08                | 0.12                        | -0.08 $\pm$ 0.21                | 0.05 $\pm$ 0.13                   | 0.02 $\pm$ 0.08              | 0.46                        | -0.03 $\pm$ 0.16              | 0.34                                |
| Chenodeoxycholic acid 3-glucuronide                        | 0.18 $\pm$ 0.46                 | 0.17 $\pm$ 0.44                | 0.98                        | -0.01 $\pm$ 0.48                | 0.16 $\pm$ 0.43                   | 0.23 $\pm$ 0.50              | 0.84                        | 0.08 $\pm$ 0.72               | 0.62                                |
| Chenodeoxycholic acid 24-glucuronide                       | 0.06 $\pm$ 0.12                 | 0.08 $\pm$ 0.14                | 0.76                        | 0.02 $\pm$ 0.18                 | 0.09 $\pm$ 0.14                   | 0.05 $\pm$ 0.11              | 0.45                        | -0.04 $\pm$ 0.20              | 0.42                                |
| Lithocholic acid 24-glucuronide                            | 0.00 $\pm$ 0.00                 | 0.09 $\pm$ 0.19                | 0.13                        | 0.09 $\pm$ 0.19                 | 0.07 $\pm$ 0.19                   | 0.05 $\pm$ 0.18              | 0.86                        | -0.03 $\pm$ 0.28              | 0.29                                |

Listed bile acids (29 compounds) were detected in <90% of fecal samples. Statistical significances of within-group shifts were determined by paired permutational *t*-tests, while between-group differences (AX vs MCC; W6-BL, week 6 - baseline) were determined by unpaired permutational *t*-tests. Data are means  $\pm$  SD. Statistical significance was set at *p*<0.01, bolded *p* values are approaching statistical significance (*p*<0.05). <sup>a</sup> One outlier >5\*SD from the mean was excluded.
