# Supplementary material for: Elucidating the role of the gut microbiota in the physiological effects of dietary fiber
Source: PubMed Central journal article supplement (PMC9107176; doi:10.1186/s40168-022-01248-5), 2022-05-13

**A** Background Noise

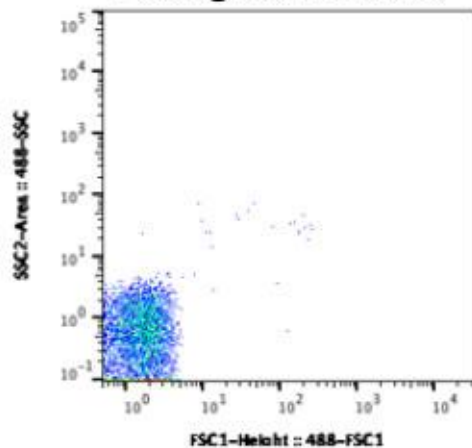

**B** Scatter

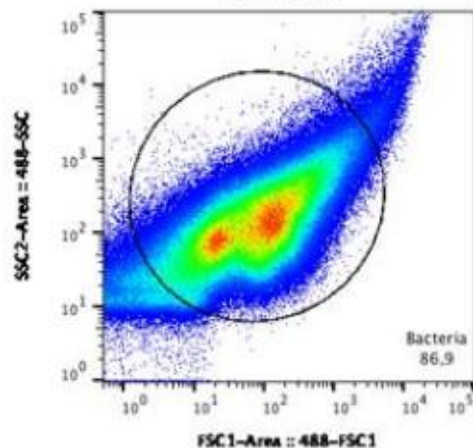

**C** Cy5-Negative

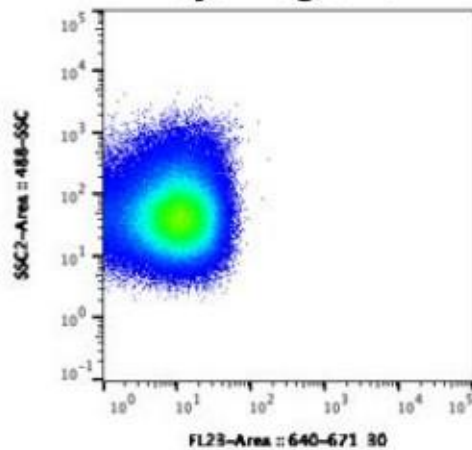

**D** Cy5-Positive

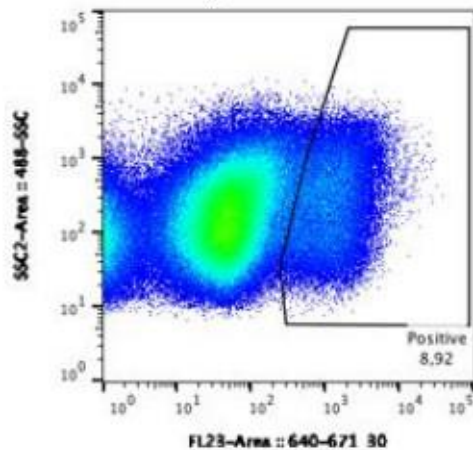

Supplement: 40168_2022_1248_MOESM7_ESM.pdf [file 40168_2022_1248_MOESM7_ESM.pdf]
