# Supplementary material for: Elucidating the role of the gut microbiota in the physiological effects of dietary fiber
Source: PubMed Central journal article supplement (PMC9107176; doi:10.1186/s40168-022-01248-5), 2022-05-13
Supplement: 40168_2022_1248_MOESM8_ESM.pdf [file 40168_2022_1248_MOESM8_ESM.pdf]

**Additional file 8: Table S6.** Relative Abundance of Bacterial Taxa Activated through *ex vivo* Incubation with Arabinoxylan and Recovered by FACS.

| α-Diversity Index or Taxonomic Group  | Arabinoxylan (n=15) |              |              |                                                       |                           |                                                       |                           |
|---------------------------------------|---------------------|--------------|--------------|-------------------------------------------------------|---------------------------|-------------------------------------------------------|---------------------------|
|                                       | Time 0              | Time 6       | FACS Sorted  | FACS vs Time 0<br>Log <sub>2</sub> Fold<br>Difference | FACS vs Time 0<br>p value | FACS vs Time 6<br>Log <sub>2</sub> Fold<br>Difference | FACS vs Time 6<br>p value |
| <b>α-Diversity Index<sup>a</sup></b>  |                     |              |              |                                                       |                           |                                                       |                           |
| Shannon Index                         | 3.60±0.26           | 3.66±0.23    | 2.75±0.89    | -0.50                                                 | <b>0.0008</b>             | -0.52                                                 | <b>0.002</b>              |
| Inverse Simpson Index                 | 20.35±8.61          | 22.09±7.99   | 11.82±9.13   | -1.15                                                 | <b>0.0004</b>             | -1.30                                                 | <b>0.0002</b>             |
| Chao1 Index                           | 215.59±48.53        | 210.46±40.21 | 159.06±23.88 | -0.42                                                 | <b>&lt;0.0001</b>         | -0.39                                                 | <b>&lt;0.0001</b>         |
| Total Number of ASVs                  | 167.73±39.9         | 168.00±32.22 | 115.27±17.97 | -0.51                                                 | <b>0.0001</b>             | -0.53                                                 | <b>0.0001</b>             |
| <b>Phyla<sup>b</sup></b>              |                     |              |              |                                                       |                           |                                                       |                           |
| Bacteroidetes                         | 42.25±7.40          | 41.69±8.77   | 43.83±27.84  | 0.41                                                  | 0.09                      | 0.37                                                  | 0.13                      |
| Firmicutes                            | 49.92±5.93          | 47.19±8.02   | 38.88±26.57  | 0.14                                                  | 0.60                      | 0.16                                                  | 0.54                      |
| Proteobacteria                        | 1.45±1.50           | 4.78±5.90    | 15.70±28.72  | 2.07                                                  | <b>0.001</b>              | 0.79                                                  | 0.20                      |
| Actinobacteria                        | 4.65±4.56           | 4.37±3.96    | 2.44±2.90    | -0.60                                                 | 0.34                      | -0.53                                                 | 0.41                      |
| <b>Family<sup>b</sup></b>             |                     |              |              |                                                       |                           |                                                       |                           |
| <i>Bacteroidaceae</i>                 | 28.27±14.89         | 31.40±13.34  | 39.58±27.12  | 1.55                                                  | <b>0.0006</b>             | 1.42                                                  | <b>0.001</b>              |
| <i>Lachnospiraceae</i>                | 19.02±2.60          | 19.90±4.30   | 26.27±23.73  | 0.59                                                  | 0.02                      | 0.68                                                  | 0.01                      |
| <i>Enterobacteriaceae</i>             | 0.83±1.31           | 4.36±5.89    | 15.57±28.71  | 5.34                                                  | <b>&lt;0.0001</b>         | 3.48                                                  | <b>&lt;0.0001</b>         |
| <i>Ruminococcaceae</i>                | 12.64±5.05          | 11.32±5.60   | 5.43±6.74    | -0.85                                                 | <b>0.001</b>              | -0.62                                                 | 0.05                      |
| <i>Prevotellaceae</i>                 | 8.68±13.64          | 4.92±7.74    | 3.17±7.60    | -1.36                                                 | 0.26                      | -0.09                                                 | 0.94                      |
| <i>Bifidobacteriaceae</i>             | 4.10±4.14           | 3.99±3.62    | 2.31±2.74    | -0.44                                                 | 0.50                      | -0.36                                                 | 0.59                      |
| <i>Veillonellaceae</i>                | 7.76±9.51           | 5.63±6.04    | 1.47±1.84    | -1.81                                                 | 0.01                      | -1.14                                                 | 0.10                      |
| <i>Lactobacillaceae</i>               | 0.03±0.06           | 0.09±0.14    | 1.02±1.42    | 6.54                                                  | <b>&lt;0.0001</b>         | 5.38                                                  | <b>&lt;0.0001</b>         |
| <i>Rikenellaceae</i>                  | 3.09±4.56           | 3.09±4.82    | 0.34±0.45    | -2.67                                                 | <b>0.0001</b>             | -2.75                                                 | <b>0.0003</b>             |
| <i>Streptococcaceae</i>               | 1.88±1.74           | 1.97±2.31    | 0.30±0.26    | -1.81                                                 | <b>0.002</b>              | -1.78                                                 | <b>0.008</b>              |
| <b>Genera<sup>b</sup></b>             |                     |              |              |                                                       |                           |                                                       |                           |
| <i>Bacteroides</i>                    | 28.27±14.89         | 31.40±13.34  | 39.58±27.12  | 0.91                                                  | 0.03                      | 0.93                                                  | 0.04                      |
| <i>Escherichia/Shigella</i>           | 0.83±1.31           | 4.36±5.89    | 15.57±28.71  | 3.13                                                  | <b>&lt;0.0001</b>         | 3.04                                                  | <b>0.0005</b>             |
| <i>Blautia</i>                        | 3.75±2.06           | 4.20±1.24    | 10.40±16.22  | 0.63                                                  | 0.04                      | 0.66                                                  | 0.05                      |
| <i>Dorea</i>                          | 1.47±0.47           | 1.59±0.70    | 4.90±10.31   | 0.51                                                  | 0.19                      | 0.80                                                  | 0.04                      |
| <i>Lachnospiraceae incertae sedis</i> | 3.08±2.53           | 3.41±2.50    | 2.68±2.71    | -0.44                                                 | 0.27                      | -0.27                                                 | 0.51                      |
| <i>Bifidobacterium</i>                | 4.10±4.14           | 3.99±3.62    | 2.31±2.74    | -0.76                                                 | 0.24                      | -0.54                                                 | 0.44                      |
| <i>Roseburia</i>                      | 3.01±2.18           | 3.29±1.99    | 2.16±2.84    | -1.23                                                 | <b>0.002</b>              | -0.14                                                 | 0.79                      |
| <i>Paraprevotella</i>                 | 0.97±3.44           | 0.97±3.67    | 1.93±7.03    | 0.28                                                  | 0.88                      | 1.43                                                  | 0.54                      |
| <i>Fusicatenibacter</i>               | 2.81±1.56           | 2.62±1.43    | 1.87±1.45    | -0.76                                                 | 0.09                      | -0.31                                                 | 0.48                      |
| <i>Ruminococcus</i>                   | 1.74±2.13           | 2.04±2.73    | 1.38±2.94    | -0.75                                                 | 0.31                      | -0.74                                                 | 0.35                      |
| <i>Faecalibacterium</i>               | 5.34±2.99           | 4.38±2.62    | 1.34±1.58    | -2.21                                                 | <b>&lt;0.0001</b>         | -1.55                                                 | <b>0.001</b>              |
| <i>Coprococcus</i>                    | 1.45±1.44           | 1.56±1.54    | 1.24±1.79    | -0.53                                                 | 0.31                      | -0.42                                                 | 0.47                      |
| <i>Prevotella</i>                     | 6.97±12.33          | 3.71±7.08    | 1.24±3.66    | -3.35                                                 | 0.04                      | -1.35                                                 | 0.36                      |
| <i>Clostridium XIVa</i>               | 1.30±0.92           | 1.09±0.76    | 1.20±2.88    | -0.36                                                 | 0.58                      | -0.83                                                 | 0.11                      |
| <i>Gemmiger</i>                       | 1.22±1.06           | 1.00±0.80    | 1.06±1.22    | 0.06                                                  | 0.93                      | 0.61                                                  | 0.35                      |
| <i>Lactobacillus</i>                  | 0.03±0.06           | 0.09±0.14    | 1.02±1.42    | 5.90                                                  | <b>&lt;0.0001</b>         | 4.96                                                  | <b>&lt;0.0001</b>         |
| <i>Oscillibacter</i>                  | 1.61±0.97           | 1.55±1.11    | 0.47±0.57    | -1.75                                                 | <b>0.0001</b>             | -1.49                                                 | <b>0.003</b>              |
| <i>Alistipes</i>                      | 3.09±4.56           | 3.09±4.82    | 0.34±0.45    | -3.20                                                 | <b>&lt;0.0001</b>         | -3.12                                                 | <b>&lt;0.0001</b>         |
| <i>Streptococcus</i>                  | 1.57±1.11           | 1.83±2.28    | 0.30±0.26    | -2.16                                                 | <b>0.003</b>              | -1.97                                                 | <b>0.004</b>              |
| <i>Clostridium XVIII</i>              | 0.75±0.53           | 0.67±0.55    | 0.15±0.18    | -1.90                                                 | <b>0.008</b>              | -1.38                                                 | 0.06                      |

**Additional file 8: Table S6.** Continued

| α-Diversity Index or Taxonomic Group                                                           | Arabinoxylan (n=15) |           |             |                                                       |                           |                                                       |                           |
|------------------------------------------------------------------------------------------------|---------------------|-----------|-------------|-------------------------------------------------------|---------------------------|-------------------------------------------------------|---------------------------|
|                                                                                                | Time 0              | Time 6    | FACS Sorted | FACS vs Time 0<br>Log <sub>2</sub> Fold<br>Difference | FACS vs Time 0<br>p value | FACS vs Time 6<br>Log <sub>2</sub> Fold<br>Difference | FACS vs Time 6<br>p value |
| <b>Amplicon sequence variant (ASV Number, closest hit in database, % identity)<sup>b</sup></b> |                     |           |             |                                                       |                           |                                                       |                           |
| 3ur8h3, <i>Escherichia fergusonii/Shigella sonnei</i> , 100%                                   | 0.90±1.55           | 4.50±6.39 | 15.59±28.82 | 3.20                                                  | <b>&lt;0.0001</b>         | 1.19                                                  | 0.10                      |
| 2uaio6, <i>Bacteroides vulgatus</i> , 100%                                                     | 3.55±3.52           | 4.14±4.51 | 4.96±6.85   | 0.54                                                  | 0.48                      | 1.06                                                  | 0.13                      |
| 4c03f6, <i>Bacteroides xylanisolvens</i> , 100%                                                | 0.61±1.10           | 1.44±2.58 | 4.82±9.40   | 2.96                                                  | <b>0.003</b>              | 2.06                                                  | 0.04                      |
| fepklg, <i>Dorea longicatena</i> , 100%                                                        | 1.16±0.49           | 1.38±0.49 | 4.49±10.19  | -0.10                                                 | 0.74                      | 0.40                                                  | 0.26                      |
| 6eanz7, <i>Blautia massiliensis</i> , 100%                                                     | 1.24±0.87           | 1.50±1.00 | 4.20±10.41  | -0.25                                                 | 0.46                      | -0.03                                                 | 0.94                      |
| 6wurws, <i>Bacteroides ovatus</i> , 100%                                                       | 0.98±1.83           | 1.57±2.22 | 3.77±5.65   | 1.54                                                  | 0.05                      | 1.52                                                  | 0.11                      |
| 935uue, <i>Bacteroides cellulosilyticus</i> , 100%                                             | 2.20±5.92           | 2.45±5.97 | 3.74±10.78  | -0.52                                                 | 0.64                      | -0.17                                                 | 0.88                      |
| ff0431, <i>Bacteroides xylanisolvens</i> , 99.7%                                               | 0.36±0.66           | 0.91±1.76 | 3.14±6.70   | 2.49                                                  | 0.02                      | 1.65                                                  | 0.12                      |
| tmdvof, <i>Bacteroides plebeius</i> , 100%                                                     | 3.74±9.70           | 2.71±7.32 | 3.07±8.09   | 3.31                                                  | <b>0.001</b>              | 1.28                                                  | 0.08                      |
| hcf4f5, <i>Blautia obeum</i> , 100%                                                            | 1.09±1.16           | 0.81±0.64 | 2.01±3.63   | -0.27                                                 | 0.66                      | 1.13                                                  | 0.06                      |
| 2st345, <i>Blautia faecis</i> , 100%                                                           | 0.45±0.33           | 0.53±0.45 | 1.90±2.58   | 1.10                                                  | 0.04                      | 1.41                                                  | 0.01                      |
| rfal2b, <i>Fusicatenibacter saccharivorans</i> , 100%                                          | 2.88±1.48           | 2.49±1.34 | 1.90±1.50   | -1.40                                                 | <b>&lt;0.001</b>          | -0.37                                                 | 0.27                      |
| e9ptub, <i>Blautia wexlerae</i> , 100%                                                         | 0.86±0.66           | 0.96±0.56 | 1.89±2.30   | 0.62                                                  | 0.13                      | 0.91                                                  | 0.05                      |
| 5mi71s, <i>Bacteroides koreensis</i> , 99.7%                                                   | 0.19±0.36           | 0.40±0.87 | 1.88±4.17   | 3.68                                                  | <b>0.0007</b>             | 3.31                                                  | <b>0.005</b>              |
| 4ma8bd, <i>Eubacterium rectale</i> , 100%                                                      | 1.93±2.10           | 2.12±2.23 | 1.71±2.55   | -0.75                                                 | 0.22                      | -0.15                                                 | 0.83                      |
| cb107c, <i>Bacteroides ovatus</i> , 99.7%                                                      | 0.31±0.47           | 0.55±0.76 | 1.66±3.19   | 1.85                                                  | 0.07                      | 1.93                                                  | 0.08                      |
| jbtn3b, <i>Lachnospiraceae</i> sp.,                                                            | 1.58±2.44           | 1.92±2.63 | 1.40±1.74   | -0.96                                                 | 0.28                      | -0.17                                                 | 0.83                      |
| 352ie0, <i>Bacteroides koreensis</i> , 99.7%                                                   | 0.36±0.68           | 0.50±0.86 | 1.25±2.40   | 1.74                                                  | 0.09                      | 0.73                                                  | 0.47                      |
| t9mxq7, <i>Bacteroides vulgatus</i> , 99.7%                                                    | 1.46±1.80           | 1.69±2.60 | 1.20±2.44   | -1.47                                                 | 0.05                      | -0.57                                                 | 0.46                      |
| ic9xvj, <i>Bifidobacterium longum</i> , 100%                                                   | 2.10±2.48           | 2.17±1.99 | 1.11±1.53   | -1.27                                                 | 0.08                      | -0.91                                                 | 0.23                      |
| hiw9kp, <i>Bacteroides dorei</i> , 100%                                                        | 1.46±3.02           | 1.63±2.92 | 1.03±1.61   | -0.73                                                 | 0.33                      | -0.49                                                 | 0.55                      |
| p3xfey, <i>Paraprevotella clara</i> , 97.8%                                                    | 0.60±2.07           | 0.50±1.90 | 1.03±3.71   | -0.87                                                 | 0.51                      | 2.54                                                  | 0.16                      |
| pgue8q, <i>Lactobacillus crispatus/gallinarum</i> , 100%                                       | 0.02±0.05           | 0.09±0.14 | 0.97±1.41   | 7.03                                                  | <b>&lt;0.0001</b>         | 5.10                                                  | <b>&lt;0.0001</b>         |
| 49kgjb, <i>Ruminococcaceae</i>                                                                 | 0.87±1.09           | 0.75±0.97 | 0.43±1.17   | -2.26                                                 | <b>0.0098</b>             | -1.28                                                 | 0.17                      |
| eb999b, <i>Faecalibacterium prausnitzii</i> , 99.7%                                            | 1.35±1.48           | 1.22±1.19 | 0.47±0.78   | -2.20                                                 | <b>0.001</b>              | -1.21                                                 | 0.10                      |
| 3rw028, <i>Faecalibacterium prausnitzii</i> , 98.8%                                            | 0.99±0.61           | 1.02±1.08 | 0.27±0.34   | -2.40                                                 | <b>&lt;0.0001</b>         | -1.74                                                 | <b>0.006</b>              |
| 6pygnt, <i>Dialister invisus</i> , 100%                                                        | 1.64±2.72           | 1.27±1.85 | 0.26±0.44   | -2.80                                                 | <b>0.0007</b>             | -2.35                                                 | <b>0.006</b>              |
| bdmzc3, <i>Faecalibacterium prausnitzii</i> , 99%                                              | 1.44±1.70           | 0.76±0.80 | 0.21±0.36   | -3.66                                                 | <b>&lt;0.0001</b>         | -1.98                                                 | <b>0.002</b>              |
| 19n89a, <i>Coprococcus eutactus</i> , 99.8%                                                    | 0.28±0.64           | 0.26±0.67 | 0.18±0.66   | -3.85                                                 | <b>0.001</b>              | -2.62                                                 | 0.12                      |
| gh9q6u, <i>Streptococcus thermophilus</i> , 100%                                               | 0.83±0.68           | 1.14±1.64 | 0.18±0.19   | -2.52                                                 | <b>&lt;0.0001</b>         | -2.29                                                 | <b>0.0005</b>             |
| dx5pax, <i>Faecalibacillus intestinalis</i> , 100%                                             | 0.82±0.56           | 0.72±0.58 | 0.17±0.16   | -1.76                                                 | <b>0.006</b>              | -1.03                                                 | 0.12                      |

Statistically significant differences between the bacterial consortia activated at 6-hours incubation with arabinoxylan and recovered by fluorescence-activated cell sorting (FACS) and the fecal bacterial community at 0-hours and 6-hours incubation with arabinoxylan were determined by either (a) one-way ANOVA with permutations or (b) testing for differences in the differential abundance of taxa using the R package DESeq2. Statistical significance was set at  $p < 0.01$  (bolded  $p$  values). Data are presented as mean relative abundance ± SD.
