# Supplementary material for: Elucidating the role of the gut microbiota in the physiological effects of dietary fiber
Source: PubMed Central journal article supplement (PMC9107176; doi:10.1186/s40168-022-01248-5), 2022-05-13

# Additional file 9: Figure S3.

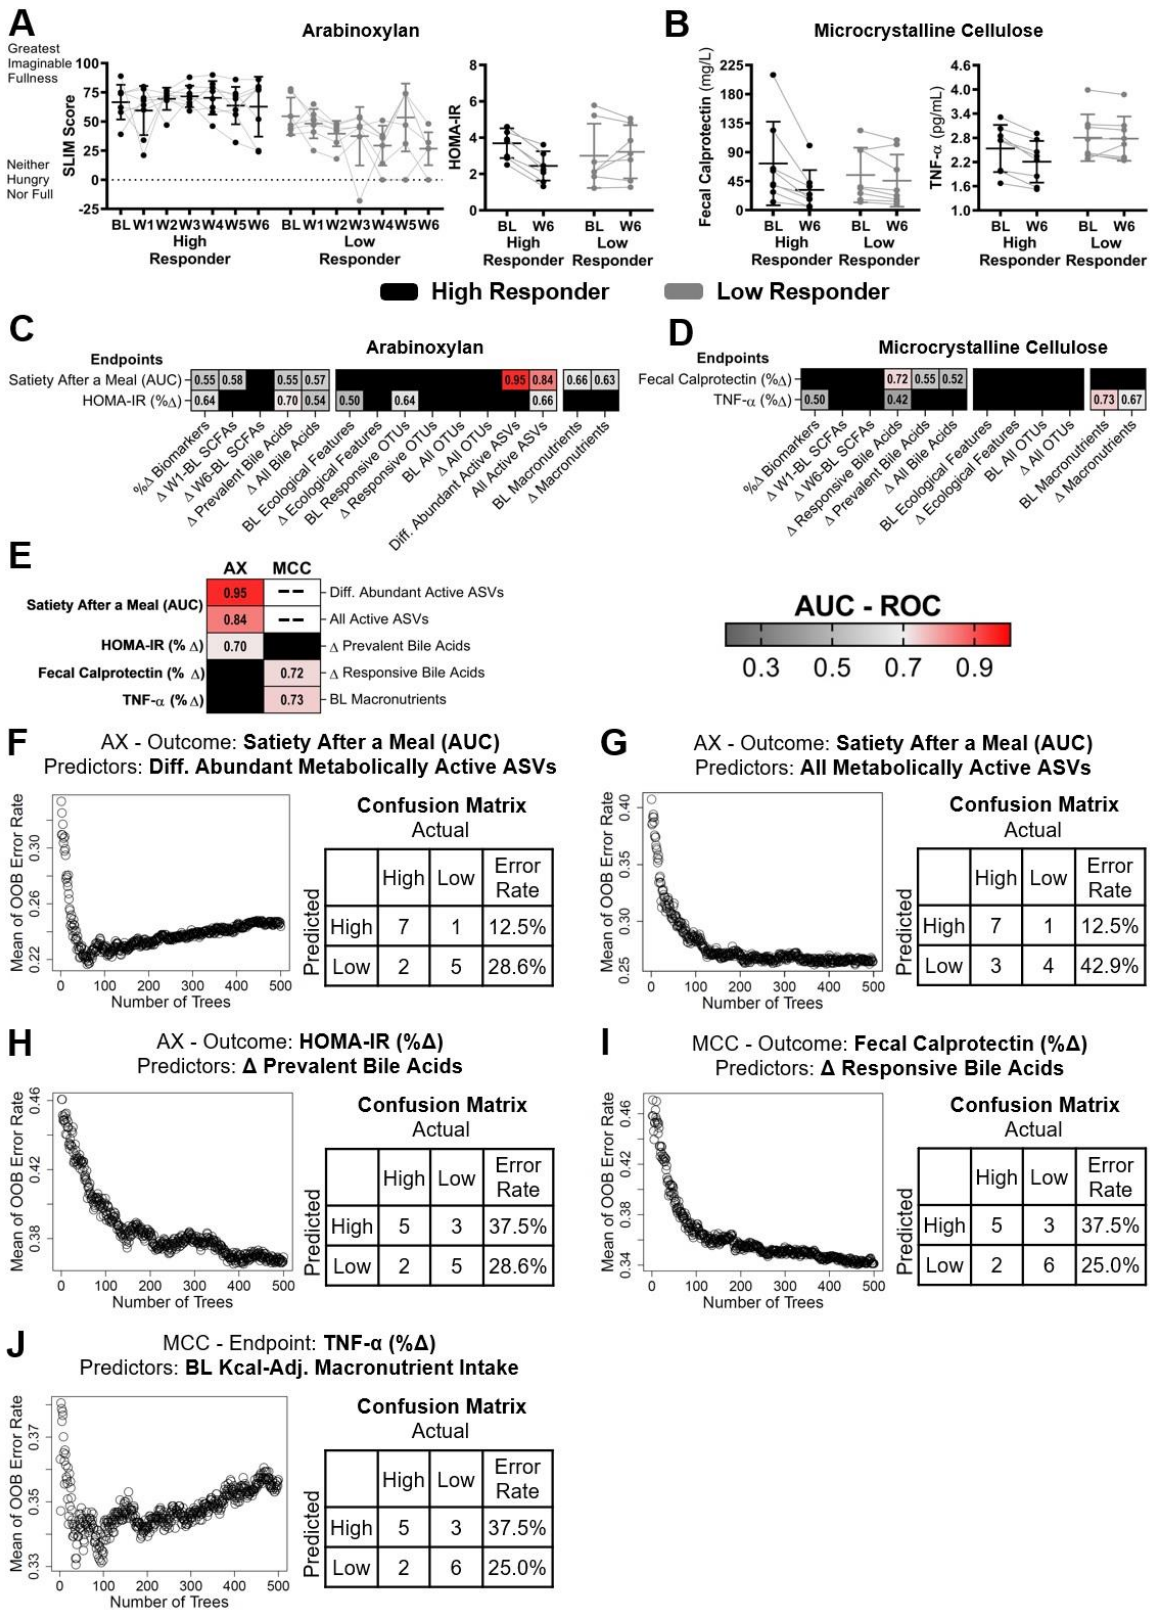

Supplement: 40168_2022_1248_MOESM9_ESM.pdf [file 40168_2022_1248_MOESM9_ESM.pdf]
