# Supplementary material for: Elucidating the role of the gut microbiota in the physiological effects of dietary fiber
Source: PubMed Central journal article supplement (PMC9107176; doi:10.1186/s40168-022-01248-5), 2022-05-13
Supplement: 40168_2022_1248_MOESM10_ESM.pdf [file 40168_2022_1248_MOESM10_ESM.pdf]

**Additional file 10: Table S7.** Univariate and Covariate-Adjusted GLMs Assessing Fecal Microbiota-Related Factors that Associate with Surrogate Endpoints of Dietary Fiber Supplementation.

|                                                                 | Within AX Group (n=15) |                    |                    |                    |                    |                    |                    | Within MCC Group (n=16) |                |                |                    |                |                    |                    |
|-----------------------------------------------------------------|------------------------|--------------------|--------------------|--------------------|--------------------|--------------------|--------------------|-------------------------|----------------|----------------|--------------------|----------------|--------------------|--------------------|
|                                                                 | M1                     | M2                 | M3                 | M4                 | M5                 | M6                 | M7                 | M1                      | M2             | M3             | M4                 | M5             | M6                 | M7                 |
| <b>Satiety After a Meal (AUC)<sup>a</sup></b>                   |                        |                    |                    |                    |                    |                    |                    |                         |                |                |                    |                |                    |                    |
| ASV6pygnt_ <i>Dialister invisus</i> (%) <sup>3</sup>            | ↑ <b>0.03</b>          | ↑ <b>0.04</b>      | ↑ <b>0.03</b>      | ↑ <b>0.01</b>      | ↑ <b>0.02</b>      | ↑ <b>0.03</b>      | ↑ <b>0.03</b>      | --                      | --             | --             | --                 | --             | --                 | --                 |
| ASV2xmw96_ <i>Dorea formicigenerans</i> (%) <sup>3</sup>        | ↓ <b>&lt;0.001</b>     | ↓ <b>&lt;0.001</b> | ↓ <b>&lt;0.001</b> | ↓ <b>&lt;0.001</b> | ↓ <b>&lt;0.001</b> | ↓ <b>&lt;0.001</b> | ↓ <b>&lt;0.001</b> | --                      | --             | --             | --                 | --             | --                 | --                 |
| ASVeb999b_ <i>Faecalibacterium prausnitzii</i> (%) <sup>3</sup> | ↓ <b>0.03</b>          | ↓ <b>0.02</b>      | ↓ <b>0.03</b>      | ↓ 0.07             | ↓ 0.06             | ↓ <b>0.02</b>      | ↓ <b>0.04</b>      | --                      | --             | --             | --                 | --             | --                 | --                 |
| ASV56kx74_ <i>Eubacterium ramulus</i> (%) <sup>3</sup>          | ↓ <b>0.01</b>          | ↓ <b>0.01</b>      | ↓ <b>0.02</b>      | ↓ <b>0.03</b>      | ↓ <b>0.02</b>      | ↓ <b>0.006</b>     | ↓ <b>0.02</b>      | --                      | --             | --             | --                 | --             | --                 | --                 |
| <b>HOMA-IR (%Δ)<sup>b</sup></b>                                 |                        |                    |                    |                    |                    |                    |                    |                         |                |                |                    |                |                    |                    |
| Lithocholic acid (Δ)                                            | ↑ <b>0.02</b>          | ↑ <b>0.03</b>      | ↑ <b>0.02</b>      | ↑ <b>0.01</b>      | ↑ <b>0.02</b>      | ↑ <b>0.04</b>      | ↑ <b>0.02</b>      | ↑ 0.84                  | ↑ 0.85         | ↑ 0.76         | ↑ 0.83             | ↑ 0.96         | ↑ 0.80             | ↑ 0.89             |
| Isolithocholic acid (Δ)                                         | ↑ <b>0.046</b>         | ↑ 0.09             | ↑ 0.05             | ↑ <b>0.049</b>     | ↑ <b>0.046</b>     | ↑ 0.06             | ↑ 0.05             | ↑ 0.53                  | ↑ 0.53         | ↑ 0.45         | ↑ 0.49             | ↑ 0.57         | ↑ 0.41             | ↑ 0.56             |
| <b>Fecal Calprotectin (%Δ)<sup>c</sup></b>                      |                        |                    |                    |                    |                    |                    |                    |                         |                |                |                    |                |                    |                    |
| Taurolithocholic acid (Δ) <sup>3</sup>                          | ↓ 0.15                 | ↓ 0.17             | ↓ 0.15             | ↓ 0.22             | ↓ 0.27             | ↓ 0.22             | ↓ 0.09             | ↓ <b>0.001</b>          | ↓ <b>0.001</b> | ↓ <b>0.001</b> | ↓ <b>&lt;0.001</b> | ↓ <b>0.001</b> | ↓ <b>&lt;0.001</b> | ↓ <b>&lt;0.001</b> |
| Taurodeoxycholic acid (Δ) <sup>3</sup>                          | ↓ 0.41                 | ↓ 0.53             | ↓ 0.41             | ↓ 0.31             | ↓ 0.43             | ↓ 0.54             | ↓ 0.16             | ↓ <b>0.004</b>          | ↓ <b>0.005</b> | ↓ <b>0.002</b> | <b>0.001</b>       | ↓ <b>0.004</b> | ↓ <b>0.002</b>     | ↓ <b>0.001</b>     |
| Glycodeoxycholic acid (Δ)                                       | ↑ 0.18                 | ↑ 0.16             | ↑ 0.20             | ↑ 0.31             | ↑ 0.16             | ↑ 0.55             | ↑ 0.29             | ↓ <b>0.002</b>          | ↓ <b>0.002</b> | ↓ <b>0.003</b> | <b>0.003</b>       | ↓ <b>0.001</b> | ↓ <b>0.003</b>     | ↓ <b>&lt;0.001</b> |

<sup>a</sup> Satiety after a meal (AUC<sub>BL-W6</sub>) was the dependent variable in Gaussian-distributed GLM with an identity link and the relative abundance of fluorescence-activated cell sorting (FACS) sorted amplicon sequence variants (ASV) as predictors.

<sup>b</sup> HOMA-IR (percent change) was the dependent variable in binomial-distributed GLM with a probit link and shifts in the concentration of fecal bile acids (absolute change) as predictors.

<sup>c</sup> Fecal calprotectin (percent change) was the dependent variable in Gaussian-distributed GLM with an identity link and shifts in the concentration of fecal bile acids (absolute change) as predictors.

**M1**: univariate model without adjustment. **M2**: model adjusted for age. **M3**: model adjusted for sex. **M4**: model adjusted for changes in total dietary fiber intake, which considers the amount of supplemental fiber (W6-BL). **M5**: model adjusted for changes in total dietary sugar intake (W6-BL). **M6**: model adjusted for differences in stool consistency during the intervention (AUC<sub>BL-W6</sub>). **M7**: model adjusted for differences in bowel movement frequency during the intervention (AUC<sub>BL-W6</sub>). Data presented as β-coefficient directionality plus p values (significance set at p<0.05, bolded p values).

Abbreviations: <sup>3</sup>, cube root transformed prior to analysis; ASV, amplicon sequence variant; AX, arabinoxylan; AUC, area under the curve; BL, baseline; GLM, generalized linear model; HOMA-IR, homeostatic model assessment of insulin resistance; MCC, microcrystalline cellulose; W6, week 6.
