# Supplementary material for: Elucidating the role of the gut microbiota in the physiological effects of dietary fiber
Source: PubMed Central journal article supplement (PMC9107176; doi:10.1186/s40168-022-01248-5), 2022-05-13
Supplement: 40168_2022_1248_MOESM13_ESM.pdf [file 40168_2022_1248_MOESM13_ESM.pdf]

**Additional file 13: Table S8.** Description of Predictor Datasets used for Training the Independent Random Forest Classifiers.

| Brief Description                        | Detailed Description                                                                                                                                                                                                                                                                                                                          | Reference                             |
|------------------------------------------|-----------------------------------------------------------------------------------------------------------------------------------------------------------------------------------------------------------------------------------------------------------------------------------------------------------------------------------------------|---------------------------------------|
| %Δ Biomarkers                            | Percentage change from baseline to week 6 in the 14 biomarkers of host-microbiota interactions hypothesized to underlie the pathophysiology of obesity.                                                                                                                                                                                       | Table S3                              |
| Δ W1-BL SCFAs                            | Shorter-term shifts from baseline to week 1 in the fecal concentrations of acetate, propionate, butyrate, valerate, isobutyrate, and isovalerate; the relative proportions of acetate, propionate, and butyrate; and the propionate to butyrate ratio.                                                                                        | Nguyen <i>et al.</i> [1]              |
| Δ W6-BL SCFAs                            | Longer-term shifts from baseline to week 6 in the fecal concentrations of acetate, propionate, butyrate, valerate, isobutyrate, and isovalerate; the relative proportions of acetate, propionate, and butyrate; and the propionate to butyrate ratio.                                                                                         | Nguyen <i>et al.</i> [1]              |
| Δ All Bile Acids                         | Shifts from baseline to week 6 in all 60 bile acids detected.                                                                                                                                                                                                                                                                                 | Tables 1 and S5                       |
| Δ Prevalent Bile Acids                   | Shifts from baseline to week 6 in the 31 bile acids most frequently detected among fecal samples.                                                                                                                                                                                                                                             | Table 1                               |
| Δ Responsive Bile Acids                  | Shifts from baseline to week 6 in the 14 bile acids that showed a tendency to respond to MCC or AX supplementation when compared to baseline ( $p < 0.1$ , paired permutational $t$ -tests).                                                                                                                                                  | Tables 1 and S5                       |
| Δ Ecological Features                    | Shifts in fecal $\alpha$ -diversity, intra-individual $\beta$ -diversity, and the seven co-abundance response groups, plus <i>ex vivo</i> $\alpha$ -diversity and the principal components (PC1, PC2, and PC3) generated from the week 6 shifts of the 100 bacterial OTUs and the <i>ex vivo</i> relative abundance of the 90 bacterial ASVs. | Table S6 and Nguyen <i>et al.</i> [1] |
| BL Ecological Features                   | Baseline fecal $\alpha$ -diversity, baseline relative abundance of the seven co-abundance response groups, and the principal components (PC1, PC2, and PC3) generated from the 100 bacterial OTUs at baseline.                                                                                                                                | Nguyen <i>et al.</i> [1]              |
| Δ Responsive OTUs                        | Shifts in the fecal relative abundance of the 18 bacterial OTUs that significantly changed by week 6 of AX consumption when compared to baseline or MCC ( $q < 0.15$ , Wilcoxon or Mann–Whitney tests).                                                                                                                                       | Nguyen <i>et al.</i> [1]              |
| BL Responsive OTUs                       | Baseline fecal relative abundance of the 18 bacterial OTUs that significantly changed by week 6 of AX consumption when compared to baseline or MCC ( $q < 0.15$ , Wilcoxon or Mann–Whitney tests).                                                                                                                                            | Nguyen <i>et al.</i> [1]              |
| Δ All OTUs                               | Shifts in the fecal relative abundance of the 100 bacterial OTUs with an average relative abundance $\geq 0.15\%$ .                                                                                                                                                                                                                           | Nguyen <i>et al.</i> [1]              |
| BL All OTUs                              | Baseline fecal relative abundance of the 100 bacterial OTUs with an average relative abundance $\geq 0.15\%$ .                                                                                                                                                                                                                                | Nguyen <i>et al.</i> [1]              |
| Diff. Abundant Metabolically Active ASVs | Relative abundance of the 14 bacterial ASVs shown to be differentially abundant in the BONCAT-labeled, FACS-recovered consortia at 6-hours incubation with AX when compared to the total fecal bacterial community at 0-hours incubation ( $q < 0.05$ , DESeq2).                                                                              | Table S6                              |
| All Metabolically Active ASVs            | Relative abundance of the 90 bacterial ASVs shown to have an average relative abundance $\geq 0.15\%$ among the BONCAT-labeled, FACS-recovered consortia detected at 6-hours incubation with AX.                                                                                                                                              | Table S6                              |
| Δ Macronutrients                         | Change from BL to W6 in the calorie-adjusted intake of macronutrients assessed by ASA24-Canada-2014 (total carbohydrates, sugar, dietary fiber, protein, total fat, saturated fat, unsaturated fat, and cholesterol).                                                                                                                         | Table S2                              |
| BL Macronutrients                        | Baseline calorie-adjusted intake of macronutrients assessed by ASA24-Canada-2014 (total carbohydrates, sugar, dietary fiber, protein, total fat, saturated fat, unsaturated fat, and cholesterol).                                                                                                                                            | Table S2                              |

[1] Nguyen NK, Deehan EC, Zhang Z, Jin M, Baskota N, Perez-Muñoz ME, Cole J, Tuncil YE, Seethaler B, Wang T *et al.* Gut microbiota modulation with long-chain corn bran arabinoxylan in adults with overweight and obesity is linked to an individualized temporal increase in fecal propionate. *Microbiome*. 2020; 8:118.

Abbreviations: Δ, absolute change from baseline to week 6; %Δ, percent change from baseline to week 6; ASA24-Canada-2014, Canadian version of the web-based Automated Self-Administered 24-hour Dietary Assessment Tool; ASV, amplicon sequence variant; AX, arabinoxylan; BL, baseline; BONCAT, bioorthogonal non-canonical amino acid tagging; FACS, fluorescence-activated cell sorting; MCC, microcrystalline cellulose; OTU, operational taxonomic unit; SCFA, short-chain fatty acids; W6, week 6.
