# Supplementary material for: Elucidating the role of the gut microbiota in the physiological effects of dietary fiber
Source: Microbiome. 2022 May 13;10:77. doi: 10.1186/s40168-022-01248-5 (PMC9107176; doi:10.1186/s40168-022-01248-5)
Supplement: Supplementary file 4 — Additional file 3: Table S2. Macronutrient consumption at baseline and during arabinoxylan or microcrystalline cellulose supplementation. Table provides total dietary calories and macronutrients as assessed by the Canadian version of the web-based Automated Self-Administered 24-hour Dietary Assessment Tool, with participant grouped by arabinoxylan or microcrystalline cellulose supplementation. Data provided as mean ± SD. [file 40168_2022_1248_MOESM3_ESM.pdf]

**Additional file 3: Table S2.** Macronutrient Consumption at Baseline and During Arabinoxylan or Microcrystalline Cellulose Supplementation.

|                                                                 | Arabinoxylan ( <i>n</i> =15) |                     |                             |            | Microcrystalline Cellulose ( <i>n</i> =16) |                     |                             |            | Between Group Change <i>p</i> value |
|-----------------------------------------------------------------|------------------------------|---------------------|-----------------------------|------------|--------------------------------------------|---------------------|-----------------------------|------------|-------------------------------------|
|                                                                 | Baseline                     | During Intervention | Within Group <i>p</i> value | Change (%) | Baseline                                   | During Intervention | Within Group <i>p</i> value | Change (%) |                                     |
| <b>Energy (kcal)</b>                                            | 2344 ± 1230                  | 2331 ± 978          | 0.95                        | 9 ± 38     | 1939 ± 505                                 | 2220 ± 648          | 0.06                        | 17 ± 27    | 0.63                                |
| <b>Carbohydrates (g)</b>                                        | 262 ± 133                    | 273 ± 130           | 0.66                        | 11 ± 35    | 221 ± 76                                   | 257 ± 89            | <b>0.046</b>                | 20 ± 31    | 0.21                                |
| Sugar (g)                                                       | 114 ± 58                     | 138 ± 72            | <b>0.04</b>                 | 35 ± 62    | 90 ± 35                                    | 118 ± 54            | <b>0.03</b>                 | 46 ± 80    | 0.55                                |
| Background dietary fiber (g) <sup>a</sup>                       | 21 ± 6                       | 19 ± 8              | 0.56                        | 0.3 ± 46   | 19 ± 8                                     | 18 ± 5              | 0.41                        | 3 ± 39     | 0.92                                |
| Background dietary fiber plus fiber supplement (g) <sup>b</sup> | 21 ± 6                       | 46 ± 12             | <b>0.0002</b>               | 142 ± 84   | 19 ± 8                                     | 44 ± 8              | <b>0.0002</b>               | 171 ± 113  | 0.50                                |
| <i>Females (g)</i> <sup>b</sup>                                 | 19 ± 4                       | 40 ± 5              | <b>0.0002</b>               | 128 ± 81   | 19 ± 6                                     | 40 ± 6              | <b>0.0002</b>               | 140 ± 101  | 0.69                                |
| <i>Males (g)</i> <sup>b</sup>                                   | 24 ± 9                       | 58 ± 13             | <b>0.006</b>                | 169 ± 93   | 19 ± 13                                    | 53 ± 6              | <b>0.0004</b>               | 239 ± 116  | 0.15                                |
| <b>Proteins (g)</b>                                             | 99 ± 62                      | 97 ± 35             | 0.82                        | 19 ± 67    | 81 ± 37                                    | 94 ± 25             | 0.17                        | 26 ± 39    | 0.68                                |
| <b>Total fats (g)</b>                                           | 98 ± 60                      | 96 ± 42             | 0.83                        | 21 ± 68    | 76 ± 25                                    | 87 ± 33             | 0.15                        | 19 ± 43    | 0.98                                |
| Saturated fat (g)                                               | 32 ± 23                      | 32 ± 16             | 0.94                        | 43 ± 126   | 26 ± 12                                    | 33 ± 14             | 0.09                        | 37 ± 65    | 1.00                                |
| Unsaturated fat (g)                                             | 58 ± 34                      | 56 ± 24             | 0.73                        | 16 ± 61    | 43 ± 12                                    | 47 ± 17             | 0.26                        | 11 ± 35    | 0.82                                |
| <b>Cholesterol (mg)</b>                                         | 358 ± 236                    | 419 ± 183           | <b>0.047</b>                | 56 ± 88    | 335 ± 166                                  | 376 ± 128           | 0.31                        | 34 ± 68    | 0.46                                |

Statistical significances of changes within-group were determined by paired permutational *t*-test, while between-group differences of percent change (AX vs MCC; during intervention – baseline/baseline\*100) were determined by unpaired permutational *t*-test. Data are means ± SD. Statistical significance was set at *p*<0.05 (bolded *p* values).

<sup>a</sup> Total dietary fiber provided by the background diet without consideration of the supplemented fiber.

<sup>b</sup> Total dietary fiber provided by the background diet plus supplemental fiber when considering adherence to the intervention protocol.
